# Supplementary material for: Modeling A Western Lifestyle in Mice: A Novel Approach to Eradicating Aerobic Spore-Forming Bacteria from the Colonic Microbiome and Assessing Long Term Clinical Outcomes.
Source: Preprints.org preprint supplement (doi:10.20944/preprints202408.1185.v1), 2024-08-16
Supplement: Supplementary file 1 [file supplementary]

Supplementary Figures

1. **Sequence of primers used for RT-qPCR**

**House Keeping Gene*

| **Gene** | **Primer type** | **Sequence (5’ - 3’)** |
| --- | --- | --- |
| Beta-Actin* |  |  |
|  | *Sense* | CTGTCCCTGTATGCCTCTG |
|  | *Anti-sense* | ATGTCACGCACGATTTCC |
| IL-10 |  |  |
|  | *Sense* | AAGGCAGTGGAGCAGGTGAA |
|  | *Anti-sense* | CCAGCAGACTCAATACACAC |
| TLR-2 |  |  |
|  | *Sense* | CTGAAGCTGTTGCGTTACAT |
|  | *Anti-sense* | ACTACGTCTGACTCCGAGGG |
| TLR-4 |  |  |
|  | *Sense* | TTCAGAGCCGTTGGTGTATC |
|  | *Anti-sense* | CCCATTCCAGGTAGGTGTTT |
| TNF-α |  |  |
|  | *Sense* | CACCACGCTCTTCTGTCTACTG |
|  | *Anti-sense* | TGAGAAGATGATCTGAGTGTGA |
| IL-1β |  |  |
|  | *Sense* | CAGGATGAGGACATGAGCACC |
|  | *Anti-sense* | CTCTGCAGACTCAAACTCCAC |
| IL-6 |  |  |
|  | *Sense* | AGTTGCCTTCTTGGGACTGA |
|  | *Anti-sense* | TCCACGATTTCCCAGAGAAC |
| Claudin-1 |  |  |
|  | *Sense* | AGGTCTGGCGACATTAGTGG |
|  | *Anti-sense* | CGTGGTGTTGGGTAAGAGGT |
| MUC-2 |  |  |
|  | *Sense* | AAAACTTTTGACGGCGATGT |
|  | *Anti-sense* | TTCAGGTGCACAGCAAATTC |
| IL-17F |  |  |
|  | *Sense* | CCCATGGGATTACAACATCACTC |
|  | *Anti-sense* | CACTGGGCCTCAGCGATC |
| IL-23 (α sub-unit) |  |  |
|  | *Sense* | CCTTCTCCGTTCCAAGATCCT |
|  | *Anti-sense* | ACTAAGGGCTCAGTCAGAGTTGCT |
